# Supplementary material
Source: publisher site journal article supplement (https://www.dovepress.com/get_supplementary_file.php?f=385815.docx)
Supplement: Supplementary file 1 [file get_supplementary_file.php]

**Table S1. Effects of disease state and follow-up period on FPG**

| **Variables** | **FPG** | |
| --- | --- | --- |
| **Coef.** | ***P*-value** |
| **Crude model** | | |
| Comorbidity (Ref.: DM only) | -0.01216 | 0.708 |
| Follow-up period | -0.00001 | 0.552 |
| **Adjusted model** | | |
| Comorbidity (Ref.: DM only) | 0.00151 | 0.961 |
| Follow-up period | -0.00003 | 0.133 |

**Abbreviations:** FPG, fasting plasma glucose; DM, diabetes mellitus; Comorbidity, comorbidity of diabetes and hypertension; Ref., the reference group; CI, confidence interval.

**Note:** “DM only” represents patients with diabetes only, and “Comorbidity” represents patients who comorbid hypertension and diabetes.

Effects of disease state (DM only, Comorbidity) and Follow-up period are analyzed without interactions.
